# Supplementary material for: Carbon and boron nitride quantum dots as optical sensor probes for selective detection of toxic metals in drinking water: a quantum chemical prediction through structure- and morphology-dependent electronic and optical properties
Source: Royal Society of Chemistry journal article supplement (doi:10.1039/d4ra04843a), 2024-01-01
Supplement: d4ra04843a1.pdf [file d4ra04843a1.pdf]

## Supporting Information

**Carbon and boron nitride quantum dots as optical sensor probes for selective detection of toxic metals in drinking water: A quantum chemical prediction through structural and morphological dependent electronic and optical properties**

**C B Sarath Kumar<sup>a</sup>, Rence Painappallil Reji<sup>a</sup>, Yuvaraj Sivalingam<sup>b,c</sup>, Yoshiyuki Kawazoe<sup>d,e</sup>, and Velappa Jayaraman Surya<sup>a,e\*</sup>**

*<sup>a</sup>Novel, Advanced, and Applied Materials (NAAM) Laboratory, Department of Physics and Nanotechnology, SRM Institute of Science and Technology, Kattankulathur 603203, Tamil Nadu, India.*

*<sup>b</sup>Laboratory of Sensors, Energy and Electronic Devices (Lab SEED), Department of Physics and Nanotechnology, SRM Institute of Science and Technology, Kattankulathur 603203, Tamil Nadu, India.*

*<sup>c</sup>Computer, Electrical and Mathematical Sciences and Engineering Division (CEMSE), King Abdullah University of Science and Technology (KAUST), Thuwal 23955-6900, Kingdom of Saudi Arabia.*

*<sup>d</sup>New Industry Creation Hatchery Center, Tohoku University, Aoba-ku, Miyagi, Sendai 980-8579 Japan*

*<sup>e</sup>Department of Physics and Nanotechnology, SRM Institute of Science and Technology, Kattankulathur 603203, Tamil Nadu, India.*

*\*Corresponding author: [suryaj@srmist.edu.in](mailto:suryaj@srmist.edu.in)*

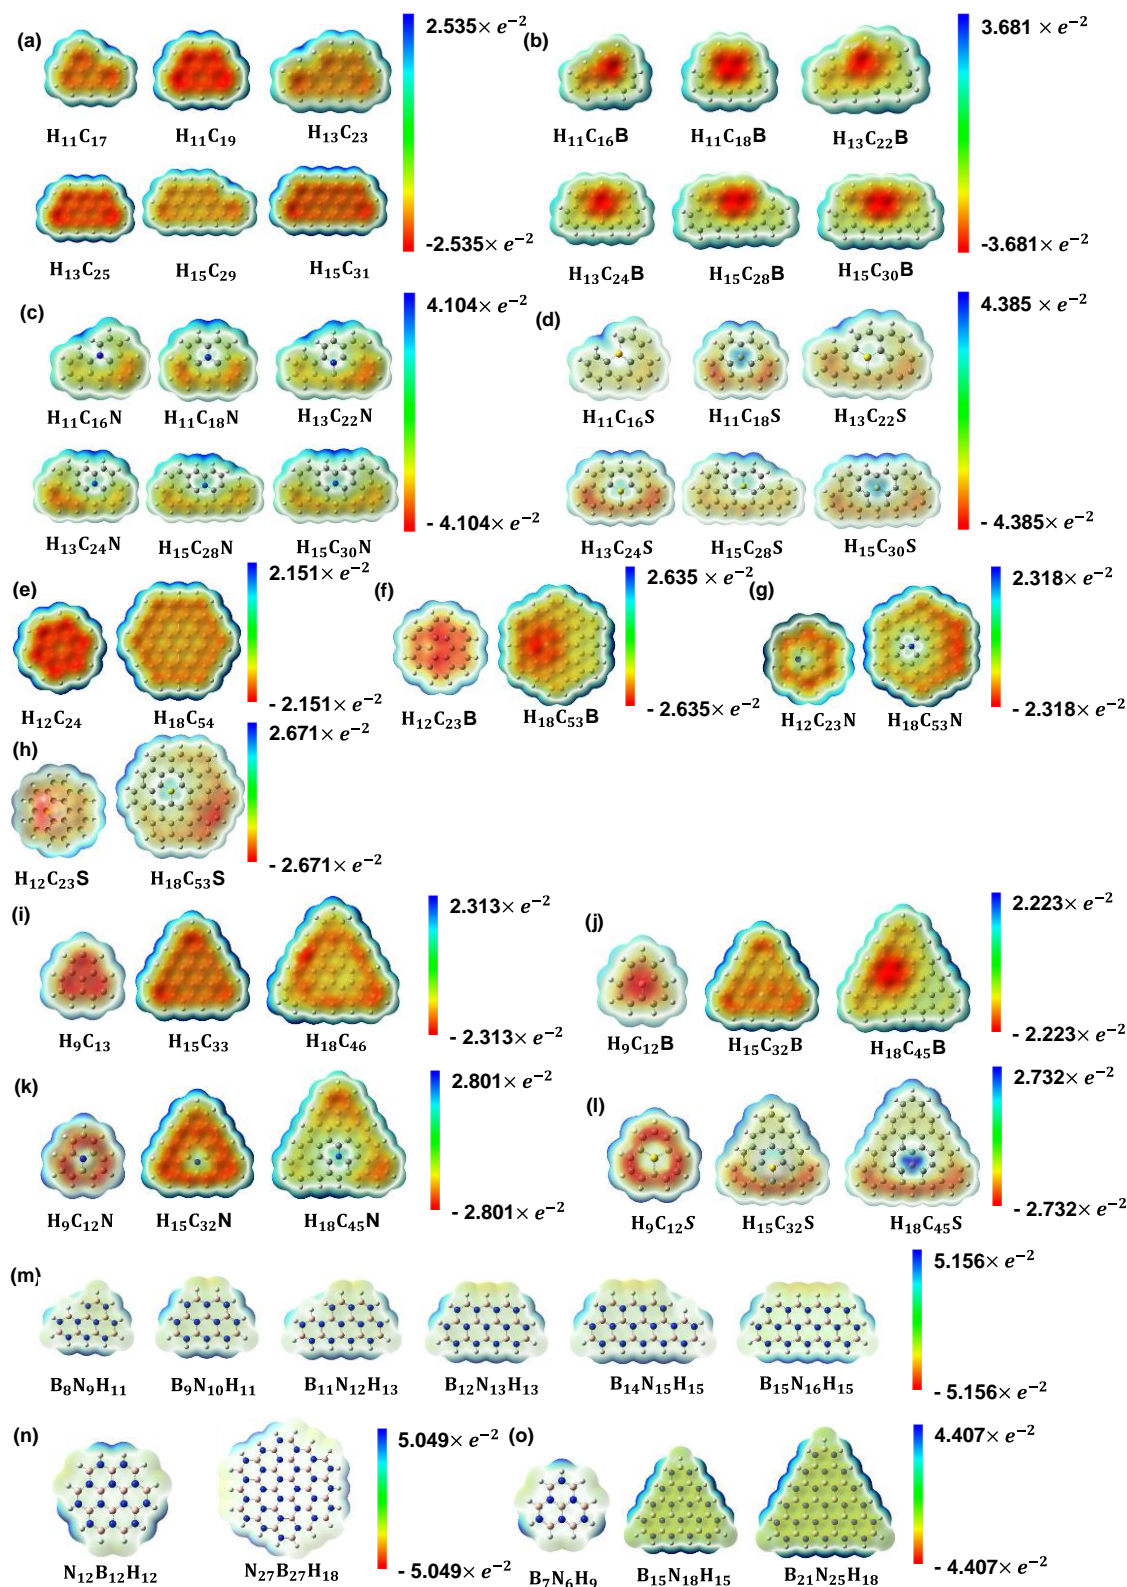

**Figure S1.** ESP plot of rectangular (a) CQDs, (b) boron-doped CQDs, (c) nitrogen-doped CQDs, (d) sulphur-doped CQDs; Circular (e) CQDs, (f) boron-doped CQDs, (g) nitrogen-doped CQDs, (h) sulphur-doped CQDs; Triangular (i) CQDs, (j) boron-doped CQDs, (k) nitrogen-doped CQDs, (l) sulphur-doped CQDs; (m) rectangular BNQD, (n) circular BNQD, (o) triangular BNQD.

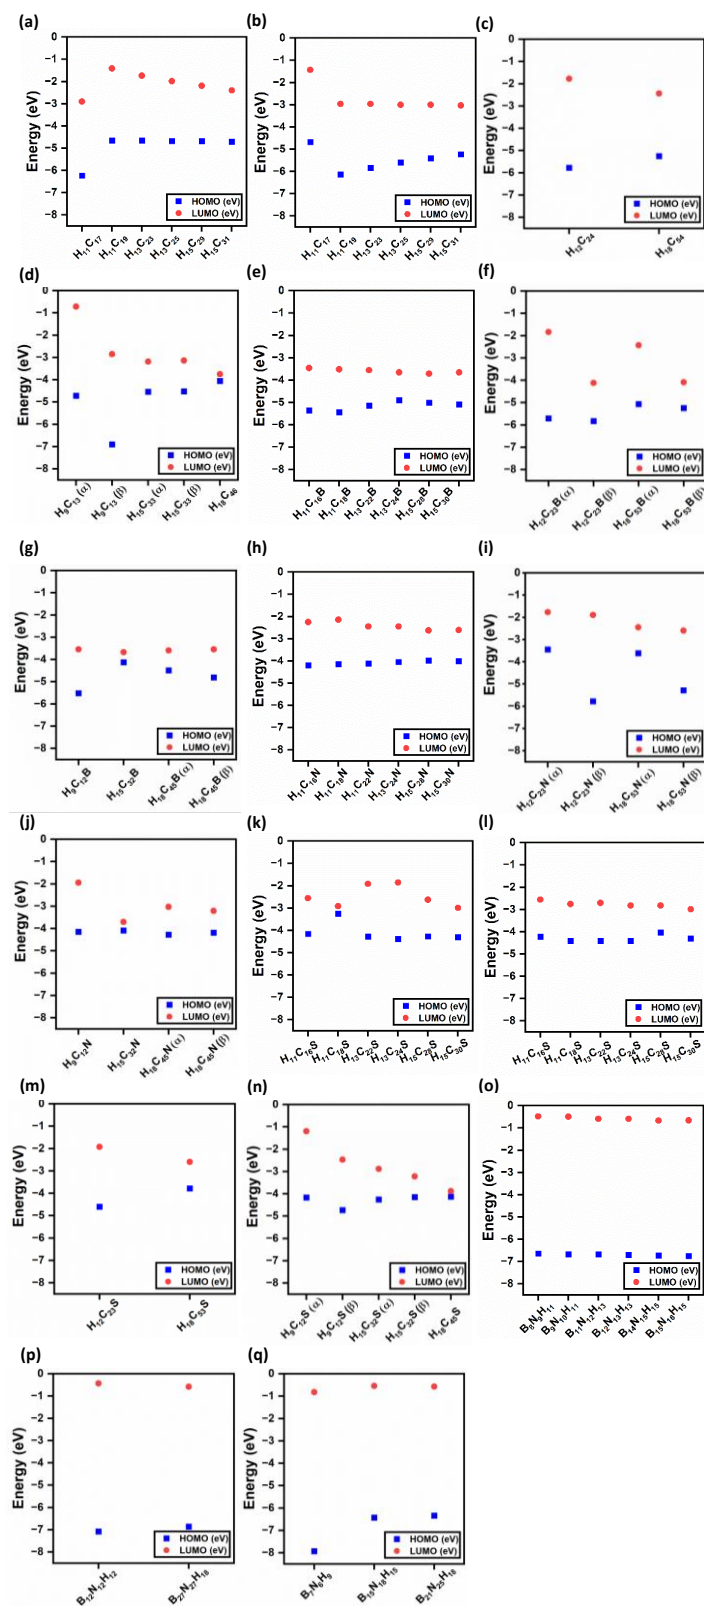

**Figure S2.** HOMO-LUMO plot of rectangular (a) alpha molecular orbitals of CQDs, (b) beta molecular orbitals of CQDs; (c) circular CQDs; (d) triangular CQDs; (e) rectangular B-doped CQDs; (f) circular B-doped CQDs; (g) triangular B-doped CQDs; (h) rectangular N-doped CQDs; (i) circular N-doped CQDs; (j) triangular N-doped CQDs; (k) alpha molecular orbitals of sulphur doped CQDs, (l) beta molecular orbitals of sulphur doped CQDs; (m) circular S-doped CQDs; (n) triangular S-doped CQDs; (o) rectangular BNQDs; (p) circular BNQDs; (q) triangular BNQDs.

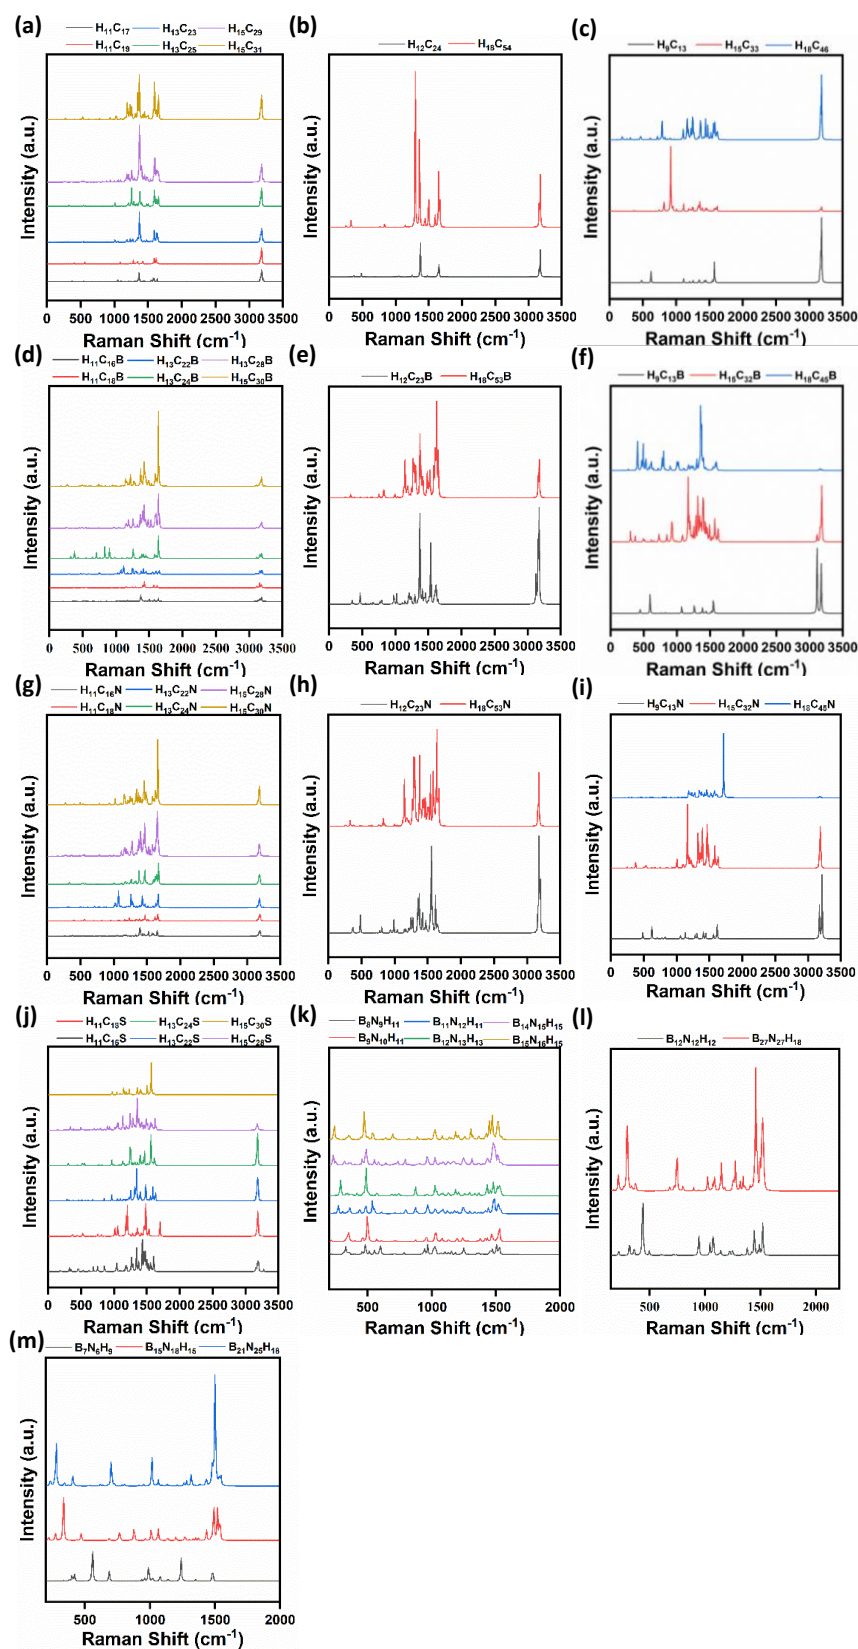

**Figure S3.** Raman Spectra plots of (a) rectangular CQDs, (b) circular CQDs, (c) triangular CQDs; Boron doped (d) rectangular CQDs, (e) circular CQDs, (f) triangular CQDs; Nitrogen doped (g) rectangular CQDs, (h) circular CQDs, (i) triangular CQDs; Sulphur doped (j) rectangular CQDs, (k) rectangular BNQDs, (l) circular BNQDs, (m) triangular BNQDs.

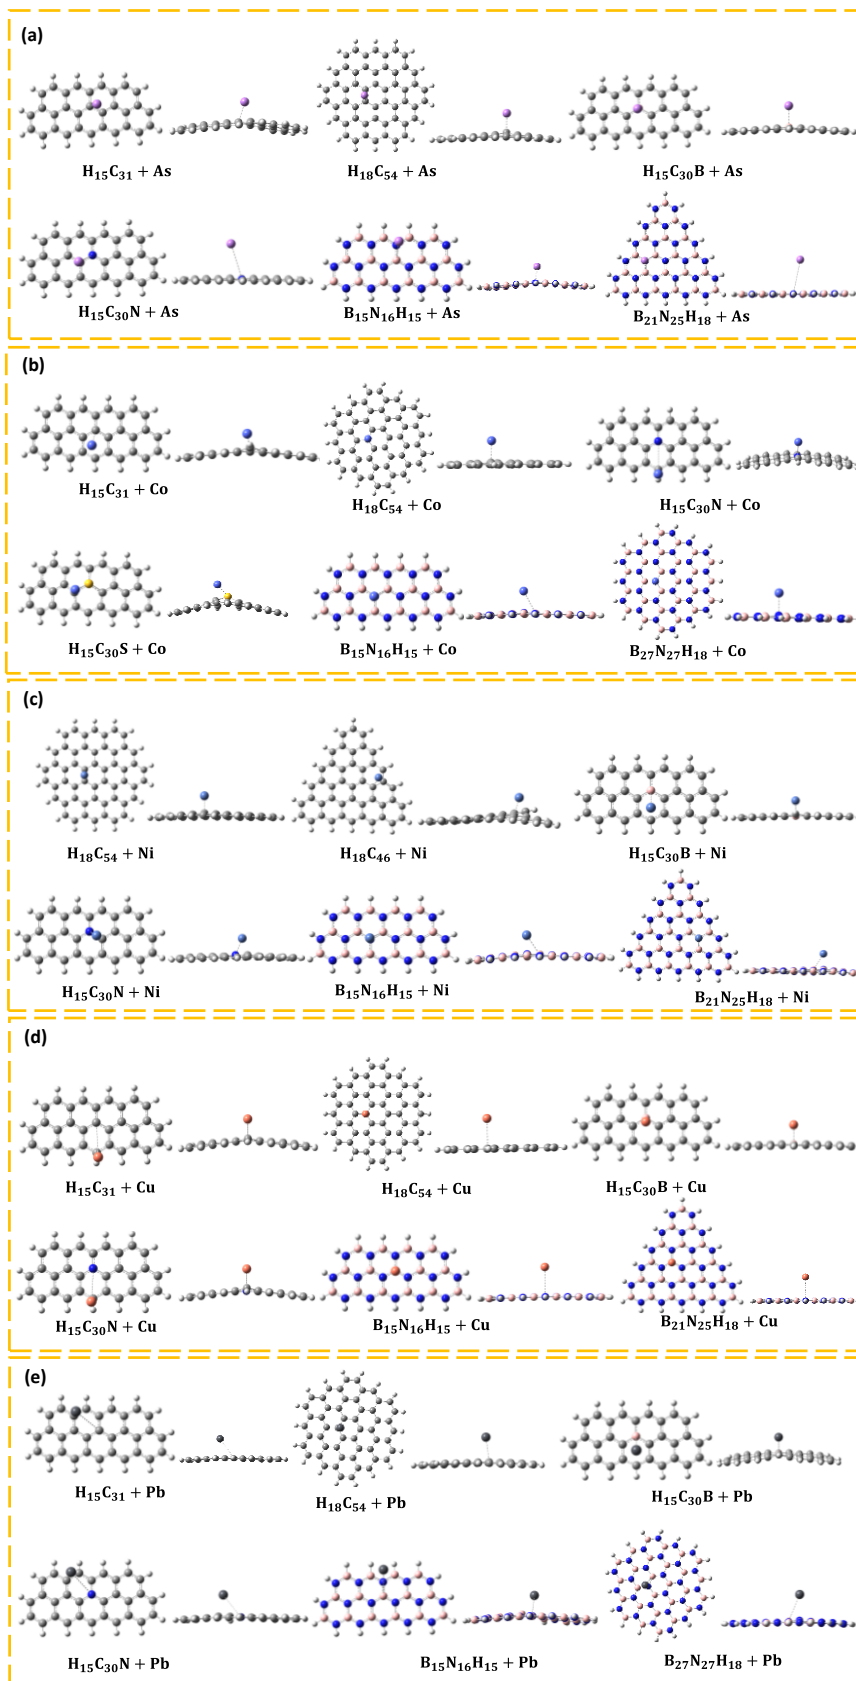

**Figure S4.** Optimized structures of QDs with metals (a) As, (b) Co, (c) Ni, (d) Cu, and (e) Pb.

**Table S1. Formation energies of QDs with toxic metals in gas and water phases.**

| Morphology/QD                                               | Formation energy (eV) |       |       |       |       |             |       |       |       |       |
|-------------------------------------------------------------|-----------------------|-------|-------|-------|-------|-------------|-------|-------|-------|-------|
|                                                             | Gas phase             |       |       |       |       | Water Phase |       |       |       |       |
|                                                             | As                    | Co    | Ni    | Cu    | Pb    | As          | Co    | Ni    | Cu    | Pb    |
| Rectangular H <sub>15</sub> C <sub>31</sub>                 | -5.97                 | -5.96 | -6.02 | -5.99 | -5.99 | -6.65       | -6.65 | -6.72 | -6.68 | -6.67 |
| Circular H <sub>18</sub> C <sub>54</sub>                    | -7.30                 | -7.29 | -7.31 | -7.29 | -7.29 | -7.21       | -7.22 | -7.23 | -7.21 | -7.21 |
| Triangular H <sub>18</sub> C <sub>46</sub>                  | -7.07                 | -7.04 | -7.06 | -7.04 | -7.04 | -6.98       | -6.97 | -6.99 | -6.96 | -6.97 |
| Rectangular H <sub>15</sub> C <sub>30</sub> B               | -5.92                 | -5.92 | -5.93 | -5.91 | -5.94 | -6.60       | -6.62 | -6.63 | -6.60 | -6.62 |
| Rectangular H <sub>15</sub> C <sub>30</sub> N               | -5.94                 | -5.93 | -5.94 | -5.93 | -5.93 | -6.62       | -6.63 | -6.64 | -6.62 | -6.62 |
| Rectangular H <sub>15</sub> C <sub>30</sub> S               | -5.79                 | -5.80 | -5.82 | -5.81 | -5.80 | -6.48       | -6.46 | -6.52 | -6.50 | -6.48 |
| Rectangular B <sub>15</sub> N <sub>16</sub> H <sub>15</sub> | -6.03                 | -6.01 | -6.04 | -6.01 | -6.02 | -6.00       | -5.98 | -6.01 | -5.98 | -5.98 |
| Circular B <sub>27</sub> N <sub>27</sub> H <sub>18</sub>    | -6.47                 | -6.46 | -6.48 | -6.46 | -6.46 | -6.43       | -6.42 | -6.45 | -6.43 | -6.43 |
| Triangular B <sub>21</sub> N <sub>25</sub> H <sub>18</sub>  | -6.38                 | -6.37 | -6.38 | -6.37 | -6.37 | -6.35       | -6.34 | -6.36 | -6.34 | -6.34 |

**Table S2. Details on dipole moment of QD before and after metals adsorption.**

| QD                                            | Dipole moment (Debye) | Complex                              | Dipole moment (Debye) |
|-----------------------------------------------|-----------------------|--------------------------------------|-----------------------|
| Rectangular H <sub>15</sub> C <sub>31</sub>   | 0.004                 | H <sub>15</sub> C <sub>31</sub> +As  | 1.57                  |
|                                               |                       | H <sub>15</sub> C <sub>31</sub> +Co  | 2.21                  |
|                                               |                       | H <sub>15</sub> C <sub>31</sub> +Ni  | 2.55                  |
|                                               |                       | H <sub>15</sub> C <sub>31</sub> +Cu  | 2.07                  |
|                                               |                       | H <sub>15</sub> C <sub>31</sub> +Pb  | 0.74                  |
| Circular H <sub>18</sub> C <sub>54</sub>      | 0.000052              | H <sub>18</sub> C <sub>54</sub> +As  | 1.01                  |
|                                               |                       | H <sub>18</sub> C <sub>54</sub> +Co  | 1.84                  |
|                                               |                       | H <sub>18</sub> C <sub>54</sub> +Ni  | 1.56                  |
|                                               |                       | H <sub>18</sub> C <sub>54</sub> +Cu  | 0.77                  |
|                                               |                       | H <sub>18</sub> C <sub>54</sub> +Pb  | 0.72                  |
| Triangular H <sub>18</sub> C <sub>46</sub>    | 0.000111              | H <sub>18</sub> C <sub>46</sub> +As  | 0.04                  |
|                                               |                       | H <sub>18</sub> C <sub>46</sub> +Co  | 0.67                  |
|                                               |                       | H <sub>18</sub> C <sub>46</sub> +Ni  | 2.94                  |
|                                               |                       | H <sub>18</sub> C <sub>46</sub> +Cu  | 1.12                  |
|                                               |                       | H <sub>18</sub> C <sub>46</sub> +Pb  | 4.07                  |
| Rectangular H <sub>15</sub> C <sub>30</sub> B | 3.13                  | H <sub>15</sub> C <sub>30</sub> B+As | 0.22                  |
|                                               |                       | H <sub>15</sub> C <sub>30</sub> B+Co | 3.53                  |
|                                               |                       | H <sub>15</sub> C <sub>30</sub> B+Ni | 3.68                  |
|                                               |                       | H <sub>15</sub> C <sub>30</sub> B+Cu | 3.26                  |
|                                               |                       | H <sub>15</sub> C <sub>30</sub> B+Pb | 4.04                  |
| Rectangular H <sub>15</sub> C <sub>30</sub> N | 3.35                  | H <sub>15</sub> C <sub>30</sub> N+As | 2.47                  |
|                                               |                       | H <sub>15</sub> C <sub>30</sub> N+Co | 1.13                  |
|                                               |                       | H <sub>15</sub> C <sub>30</sub> N+Ni | 3.78                  |
|                                               |                       | H <sub>15</sub> C <sub>30</sub> N+Cu | 1.43                  |
|                                               |                       | H <sub>15</sub> C <sub>30</sub> N+Pb | 4.98                  |
| Rectangular H <sub>15</sub> C <sub>30</sub> S | 2.47                  | H <sub>15</sub> C <sub>30</sub> S+As | 4.50                  |
|                                               |                       | H <sub>15</sub> C <sub>30</sub> S+Co | 3.55                  |
|                                               |                       | H <sub>15</sub> C <sub>30</sub> S+Ni | 0.91                  |

|                                                             |          |                                                     |      |
|-------------------------------------------------------------|----------|-----------------------------------------------------|------|
|                                                             |          | H <sub>15</sub> C <sub>30</sub> S+Cu                | 2.89 |
|                                                             |          | H <sub>15</sub> C <sub>30</sub> S+Pb                | 0.80 |
| Rectangular B <sub>15</sub> N <sub>16</sub> H <sub>15</sub> | 4.31     | B <sub>15</sub> N <sub>16</sub> H <sub>15</sub> +As | 5.17 |
|                                                             |          | B <sub>15</sub> N <sub>16</sub> H <sub>15</sub> +Co | 4.81 |
|                                                             |          | B <sub>15</sub> N <sub>16</sub> H <sub>15</sub> +Ni | 4.41 |
|                                                             |          | B <sub>15</sub> N <sub>16</sub> H <sub>15</sub> +Cu | 4.31 |
|                                                             |          | B <sub>15</sub> N <sub>16</sub> H <sub>15</sub> +Pb | 3.91 |
| Circular B <sub>27</sub> N <sub>27</sub> H <sub>18</sub>    | 0.002976 | B <sub>27</sub> N <sub>27</sub> H <sub>18</sub> +As | 0.11 |
|                                                             |          | B <sub>27</sub> N <sub>27</sub> H <sub>18</sub> +Co | 2.11 |
|                                                             |          | B <sub>27</sub> N <sub>27</sub> H <sub>18</sub> +Ni | 0.33 |
|                                                             |          | B <sub>27</sub> N <sub>27</sub> H <sub>18</sub> +Cu | 0.39 |
|                                                             |          | B <sub>27</sub> N <sub>27</sub> H <sub>18</sub> +Pb | 0.81 |
| Triangular B <sub>21</sub> N <sub>25</sub> H <sub>18</sub>  | 0.002776 | B <sub>21</sub> N <sub>25</sub> H <sub>18</sub> +As | 0.03 |
|                                                             |          | B <sub>21</sub> N <sub>25</sub> H <sub>18</sub> +Co | 2.58 |
|                                                             |          | B <sub>21</sub> N <sub>25</sub> H <sub>18</sub> +Ni | 0.22 |
|                                                             |          | B <sub>21</sub> N <sub>25</sub> H <sub>18</sub> +Cu | 0.72 |
|                                                             |          | B <sub>21</sub> N <sub>25</sub> H <sub>18</sub> +Pb | 3.19 |
